# Supplementary material for: Multimodal treatments for resectable esophagogastric junction cancer: a systematic review and network meta-analysis
Source: PubMed Central journal article supplement — Ther Adv Med Oncol. 2019 Apr 2;11:1758835919838963. doi: 10.1177/1758835919838963 (PMC6446435; doi:10.1177/1758835919838963), 2019-04-02
Supplement: Revised_supplementary_Materials.pdf [file Revised_supplementary_Materials.pdf]

## Supplementary Materials

### **Multimodal treatments for resectable esophagogastric junction cancer: a systematic review and network meta-analysis**

**Ji Cheng et al**

Search strategies: Page 2-3

Procedures of surgical and systemic treatments of included trials: Page 4-6

eTable 1. Reasons of ineligibility by full-text assessment: Page 7-9

eTable 2. Risk of bias assessment of included trials: Page 10-11

eTable 3. Clinical features of included trials re-organized by nodes: Page 12-13

eFigure 1 Network structure plot of overall survival: Page 14

eFigure 2. Funnel plot of overall survival: Page 15

eFigure 3. Sensitivity analysis of overall survival (Fixed-effects model): Page 16

eFigure 4. Sensitivity analysis of overall survival (Removal of potentially heterogenous trials): Page 17

Supplementary figure legends: Page 18

Supplementary reference: Page 19-25

## Search strategies (until Sep 26<sup>th</sup>, 2018)

### 1. PubMed

#### Search terms:

#1 Search (((((((esophageal) OR oesophageal) OR esophagus) OR gastric) OR stomach) OR esophagogastric) OR oesophagogastric) OR gastroesophageal) OR gastrooesophageal; Items found: 509659

#2 Search ((cancer) OR carcinoma) OR adenocarcinoma; Items found: 3787859

#3 Search (((resectable) OR resected) OR curable) OR curative) OR operable; Items found: 143962

#4 Search (((preoperative) OR postoperative) OR perioperative) OR adjuvant) OR neoadjuvant; Items found: 1208044

#5 Search (((randomized) OR randomised) OR randomly) OR random; Items found: 1211332

#6 #1 AND #2 AND #3 AND #4 AND #5; **Items found: 1047**

**(All fields; No limitations)**

### 2. Web of Science (Core Collection)

#### Search terms:

#1 TOPIC: (esophageal) OR TOPIC: (oesophageal) OR TOPIC: (esophagus) OR TOPIC: (gastric) OR TOPIC: (stomach) OR TOPIC: (esophagogastric) OR TOPIC: (oesophagogastric) OR TOPIC: (gastroesophageal) OR TOPIC: (gastrooesophageal); Results: 457774

#2 TOPIC: (cancer) OR TOPIC: (carcinoma) OR TOPIC: (adenocarcinoma); Results: 2589140

#3 TOPIC: (resectable) OR TOPIC: (resected) OR TOPIC: (curable) OR TOPIC: (curative) OR TOPIC: (operable); Results: 128990

#4 TOPIC: (preoperative) OR TOPIC: (postoperative) OR TOPIC: (perioperative) OR TOPIC: (adjuvant) OR TOPIC: (neoadjuvant); Results: 642942

#5 TOPIC: (randomized) OR TOPIC: (randomised) OR TOPIC: (randomly) OR TOPIC: (random); Results: 1684171

#6 #1 AND #2 AND #3 AND #4 AND #5; **Results: 1588**

**(Indexes=SCI-EXPANDED, SSCI, A&HCI, CPCI-S, CPCI-SSH, BKCI-S, BKCI-SSH, ESCI, CCR-EXPANDED, IC Timespan=All years)**

### 3. Cochrane Central Register of Controlled Trials

#### Search terms:

#1 (esophageal OR oesophageal OR esophagus) OR (gastric) OR (stomach) OR (esophagogastric OR oesophagogastric) OR (gastroesophageal OR gastrooesophageal); Results: 35668

#2 (cancer) OR (carcinoma) OR (adenocarcinoma); Results: 142464

#3 (resectable) OR (resected) OR (curable) OR (curative) OR (operable); Results: 95529

#4 (preoperative) OR (postoperative) OR (perioperative) OR (adjuvant) OR (neoadjuvant); Results: 132384

#5 (randomized) OR (randomised) OR (randomly) OR (random); Results: 874053

#6 #1 AND #2 AND #3 AND #4 AND #5; **Results: 929**

**(All Text; All Dates; Search word variations)**

#### 4. Embase

##### Search terms:

#1 esophageal OR oesophageal OR esophagus OR gastric OR stomach OR esophagogastric OR oesophagogastric OR gastroesophageal OR gastrooesophageal; Results: 808048

#2 cancer OR carcinoma OR adenocarcinoma; Results: 4124992

#3 resectable OR resected OR curable OR curative OR operable; Results: 229011

#4 preoperative OR postoperative OR perioperative OR adjuvant OR neoadjuvant; Results: 1472829

#5 randomized OR randomised OR randomly OR random; Results: 1503711

#6 #1 AND #2 AND #3 AND #4 AND #5; **Results: 1581**

**(All fields; No limitations)**

#### 5. ASCO Meeting Library

##### Search terms:

(junction OR junctional OR cardia) AND (randomized OR randomised OR randomly OR random)

**Results: 172**

**(No filter)**

**6. ESMO Meeting Library** (Due to the restricted amount and manner of search terms that were allowed to be inserted at a time, we therefore separated the search terms)

##### Search terms:

#1 junction AND randomized (Filter: Abstract; Meeting Report); **Results: 60**

#2 cardia AND randomized (Filter: Abstract; Meeting Report); **Results: 5**

#3 junction AND randomly (Filter: Abstract; Meeting Report); **Results: 18**

#4 cardia AND randomly (Filter: Abstract; Meeting Report); **Results: 3**

**Total results: 86**

**(Word variations including “randomised” and “junctional” have been automatically searched)**

## Procedures of surgical and systemic treatments of included trials

### Cats 2018

**Surgical details:** Radical resection of the primary tumor (total gastrectomy, or subtotal gastrectomy, or esophagocardiac resection) en bloc with the N1 and N2 lymph nodes (stations 1–9 and 11) and a minimum of 15 lymph nodes (D1+ lymph node dissection), and, if possible, a macroscopic proximal and distal margin of 5 cm. A potentially curative resection was defined as no evidence of macroscopic residual disease at the end of the operation, as judged by the surgeon.

**Systemic treatments:** Preoperative chemotherapy consisted of three 21-day cycles of epirubicin, cisplatin or oxaliplatin, and capecitabine. Epirubicin 50 mg/m<sup>2</sup>, cisplatin 60 mg/m<sup>2</sup>, and oxaliplatin 130 mg/m<sup>2</sup> were given intravenously on day 1 of each 21-day cycle. Capecitabine was administered at doses of 1000 mg/m<sup>2</sup> orally two times per day as tablets for 14 days in the epirubicin, cisplatin, and capecitabine regimen, and 625 mg/m<sup>2</sup> orally twice daily for 21 days in the epirubicin, oxaliplatin, and capecitabine regimen. Postoperative treatment had to start within 4–12 weeks after surgery. The postoperative chemotherapy regimen consisted of the same chemotherapy regimen as administered preoperatively. Postoperative chemoradiotherapy was based on previous dose-finding studies. Capecitabine was administered at a dose of 575 mg/m<sup>2</sup> orally twice daily on radiotherapy days, for 5 weeks, with five daily fractions per week. Cisplatin was administered at a dose of 20 mg/m<sup>2</sup> intravenously on the first day of each 5 weeks of radiotherapy treatment. The radiation dose was 45 Gy, given in 25 fractions of 1.8 Gy, for 5 weeks, with five daily fractions per week.

### Stahl 2017

**Surgical details:** Surgery was planned 3 (to 6) weeks after the end of preoperative therapy. Patients with AEG type I either underwent right transthoracic esophagectomy with two-field lymphadenectomy or radical transhiatal esophagectomy. The resected esophagus was typically replaced by the stomach, with a cervical or intrathoracic esophagogastric anastomosis. For AEG type II, extended total gastrectomy with resection of the lower esophagus including the so-called D2 lymphadenectomy was recommended.

**Systemic treatments:** Patients assigned to arm A received 12 applications of chemotherapy with weekly 5-fluorouracil (2000 mg/m<sup>2</sup>, 24 h infusion)/folinic acid (500 mg/m<sup>2</sup>, 2 h infusion) and biweekly cisplatin (50 mg/m<sup>2</sup>, 1 h infusion), within 14 weeks, followed by another 3-weekly applications. Patients assigned to arm B received the same 14-weeks chemotherapy for induction, followed by a 3-week course of combined CRT with cisplatin (50 mg/m<sup>2</sup>, 1 h infusion, days 2 and 8) and etoposide (80 mg/m<sup>2</sup>, 1 h infusion, days 3–5). The technique of radiotherapy has been described previously. A total dose of 30 Gy was applied, using 15 fractions of 2 Gy within 3 weeks. The clinical target volume included in the pre-therapeutic extension of the primary tumor with a transversal margin of 2 cm and a both sides longitudinal margin along the mucosa of the GEJ of 5 cm in Siewert type 1 tumors. In addition, the clinical target volume included suspicious lymph nodes with a 1-cm margin and the regional lymph nodes with a margin of 1.5 cm around the cardia, along the left gastric artery and the minor curvature to the incisura angularis, the coeliac artery, the proximal part of the common hepatic artery and along the first 2 cm of the splenic artery.

### Cunningham 2017

**Surgical details:** Surgery was scheduled 5–6 weeks after the last day of the final pre-operative chemotherapy cycle; therefore, there were at least 8 weeks between the last pre-operative bevacizumab administration and surgery. Surgical procedures were specified as follows; for gastric or Siewert type III

esophagogastric junction tumours either proximal, total, or distal subtotal gastrectomy was recommended with a lymphadenectomy to include as a minimum lymph node stations 1–7 to ensure at least 15 nodes were excised; for Siewert type II esophagogastric junction tumours, either extended gastrectomy or two-phase esophago-gastrectomy with a two-field lymphadenectomy; for Siewert type I esophagogastric junction or lower oesophageal tumours, esophagogastric resection with either a two phase right thoraco-abdominal approach or a left thoracoabdominal approach with a two field lymphadenectomy. Minimal access procedures were allowed only in centres that had sufficient experience (at least 20 such procedures done) after review of outcomes and complication rates by surgeons from the Trial Management Group.

**Systemic treatments:** Epirubicin, cisplatin, and capecitabine chemotherapy was given as three pre-operative and three post-operative 21-day cycles, consisting of 50 mg/m<sup>2</sup> intravenous epirubicin and 60 mg/m<sup>2</sup> cisplatin on day 1 and 1250 mg/m<sup>2</sup> oral capecitabine on days 1–21. Patients in the chemotherapy plus bevacizumab group were given 7.5 mg/kg bevacizumab as a continuous intravenous infusion on day 1 of each of the chemotherapy cycles (either before or after the chemotherapy was given). To maximise any potential treatment effect with an acceptable toxicity profile, patients in the bevacizumab group also received six further infusions of bevacizumab alone (7.5 mg/kg intravenously alone every 21 days) as maintenance treatment after post-operative chemotherapy.

#### **Noh 2014**

**Surgical details:** All patients had curative D2 gastrectomy within 6 weeks before randomization. At least 15 lymph nodes were examined to ensure adequate disease classification. All surgeons had experience doing this type of surgery (>50 procedures per year). To further ensure the quality of surgery, standard operating procedures were predefined and given to all surgeons before the start of the study, and surgery was photographed.

**Systemic treatments:** Patients assigned to the chemotherapy group received eight 3-week cycles of oral capecitabine (1000 mg/m<sup>2</sup> twice daily on days 1–14 of each cycle) plus intravenous oxaliplatin (130 mg/m<sup>2</sup> on day 1 of each cycle).

#### **Ychou 2011**

**Surgical details:** Surgery was scheduled within 4 weeks after random assignment in the S group and 4 to 6 weeks after completion of the last cycle of chemotherapy in the CS group. Surgery consisted in a complete excision of the tumor with an extended lymphadenectomy (D2 recommended). The local surgeon decided the surgical procedure in accordance with the site of the tumor and local practice.

**Systemic treatments:** According to tumor response and safety, chemotherapy comprised two or three preoperative cycles of FU 800 mg/m<sup>2</sup>/d as continuous intravenous (IV) infusion for 5 consecutive days (days 1 to 5) and cisplatin 100 mg/m<sup>2</sup> as a 1-hour infusion, every 28 days, and 3 to 4 postoperative cycles in case of good tolerance and no evidence of progressive disease after preoperative chemotherapy, for a total of 6 cycles.

#### **Cunningham 2006**

**Surgical details:** In radical total gastrectomy, the whole stomach was removed, with the proximal line of division through the distal esophagus, and the distal line of division through the proximal duodenum. The resection also included the greater and lesser omenta and any other organs involved by extension of the primary growth (e.g., pancreas, spleen, mesocolon, colon, or left lobe of liver). The procedure for a

radical subtotal distal gastrectomy was the same, but a small, viable gastric remnant was left intact. In both procedures, the resection lines had to be at least 3 cm from the edge of the macroscopic tumor. The surgeon decided the extent of the lymph-node dissection. Lymph nodes along the lesser and greater curvatures and at the origin of the left gastric artery were to be included.

**Systemic treatments:** Chemotherapy was administered for three cycles preoperatively and three cycles postoperatively. Each 3-week cycle consisted of epirubicin (50 mg per square meter of body-surface area) by intravenous bolus on day 1, cisplatin (60 mg per square meter) intravenously with hydration on day 1, and fluorouracil (200 mg per square meter) daily for 21 days by continuous intravenous infusion with the use of a double-lumen Hickman catheter and a portable infusion pump.

## **MRCOCWG 2002**

**Surgical details:** For patients in CS group, surgical resection was done 3–5 weeks after the start of the second cycle of chemotherapy, and for patients in the S group, surgery was done as soon as possible after randomization. The local surgeon decided the surgical procedure for patients in both treatment groups, in accordance with site of the tumor and local practice.

**Systemic treatments:** Chemotherapy comprised two 4-day cycles of cisplatin 80 mg/m<sup>2</sup> by intravenous infusion over 4 h on day 1 and fluorouracil 1000 mg/m<sup>2</sup> daily as a continuous infusion over 96 h, with an interval of 3 weeks between the first day of each cycle.

**eTable 1. Reasons of ineligibility by full-text assessment**

| <b>Study</b>                   | <b>Reasons</b>                                        |
|--------------------------------|-------------------------------------------------------|
| Von Döbeln 2018 <sup>1</sup>   | No subgroup survival data of junctional cases         |
| Stahl 2018 <sup>2</sup>        | No subgroup survival data of junctional cases         |
| Ruhstaller 2018 <sup>3</sup>   | No subgroup survival data of junctional cases         |
| Lee 2018 <sup>4</sup>          | No subgroup survival data of junctional cases         |
| Zhao 2017 <sup>5</sup>         | No subgroup survival data of junctional cases         |
| Shiraishi 2017 <sup>6</sup>    | No subgroup survival data of junctional cases         |
| Mukherjee 2017 <sup>7</sup>    | No subgroup survival data of junctional cases         |
| Alderson 2017 <sup>8</sup>     | No subgroup survival data of junctional cases         |
| Al-Batran 2017 <sup>9</sup>    | No subgroup survival data of junctional cases         |
| Yoshikawa 2016 <sup>10</sup>   | No subgroup survival data of junctional cases         |
| Klevebro 2016 <sup>11</sup>    | No subgroup overall survival data of junctional cases |
| Kleinberg 2016 <sup>12</sup>   | No subgroup survival data of junctional cases         |
| Fazio 2016 <sup>13</sup>       | No subgroup survival data of junctional cases         |
| Al-Batran 2016 <sup>14</sup>   | No subgroup survival data of junctional cases         |
| Zhao 2015 <sup>15</sup>        | No time-to-event survival data                        |
| Yu 2015 <sup>16</sup>          | No subgroup survival data of junctional cases         |
| Shapiro 2015 <sup>17</sup>     | No subgroup survival data of junctional cases         |
| Park 2015 <sup>18</sup>        | No subgroup survival data of junctional cases         |
| Klevebro 2015 <sup>19</sup>    | No time-to-event survival data                        |
| Tsuburaya 2014 <sup>20</sup>   | No subgroup survival data of junctional cases         |
| Shapiro 2014 <sup>21</sup>     | No subgroup survival data of junctional cases         |
| Mariette 2014 <sup>22</sup>    | No subgroup survival data of junctional cases         |
| Kang 2014 <sup>23</sup>        | No subgroup survival data of junctional cases         |
| Conroy 2014 <sup>24</sup>      | No subgroup survival data of junctional cases         |
| Bajetta 2014 <sup>25</sup>     | No subgroup survival data of junctional cases         |
| Lorenzen 2013 <sup>26</sup>    | No subgroup survival data of junctional cases         |
| Kang 2013 <sup>27</sup>        | No subgroup survival data of junctional cases         |
| Crosby 2013 <sup>28</sup>      | No subgroup survival data of junctional cases         |
| Basi 2013 <sup>29</sup>        | No subgroup survival data of junctional cases         |
| Ajani 2013 <sup>30</sup>       | No subgroup survival data of junctional cases         |
| Zhu 2012 <sup>31</sup>         | No subgroup survival data of junctional cases         |
| Van Hagen 2012 <sup>32</sup>   | No subgroup survival data of junctional cases         |
| Smalley 2012 <sup>33</sup>     | No subgroup survival data of junctional cases         |
| Lee 2012 <sup>34</sup>         | No subgroup survival data of junctional cases         |
| Bang 2012 <sup>35</sup>        | Previous report of Noh 2014                           |
| Zhang 2011 <sup>36</sup>       | No subgroup survival data of junctional cases         |
| Sasako 2011 <sup>37</sup>      | No subgroup survival data of junctional cases         |
| Burmeister 2011 <sup>38</sup>  | No subgroup survival data of junctional cases         |
| Schuhmacher 2010 <sup>39</sup> | No subgroup survival data of junctional cases         |
| Kwon 2010 <sup>40</sup>        | No subgroup survival data of junctional cases         |

|                                  |                                               |
|----------------------------------|-----------------------------------------------|
| Kulig 2010 <sup>41</sup>         | No subgroup survival data of junctional cases |
| Bamias 2010 <sup>42</sup>        | No subgroup survival data of junctional cases |
| Stahl 2009 <sup>43</sup>         | Previous report of Stahl 2017                 |
| Allum 2009 <sup>44</sup>         | No subgroup survival data of junctional cases |
| Tepper 2008 <sup>45</sup>        | No subgroup survival data of junctional cases |
| Shao 2008 <sup>46</sup>          | No subgroup survival data of junctional cases |
| Di Costanzo 2008 <sup>47</sup>   | No subgroup survival data of junctional cases |
| Sakuramoto 2007 <sup>48</sup>    | No subgroup survival data of junctional cases |
| Kelsen 2007 <sup>49</sup>        | No subgroup survival data of junctional cases |
| Findlay 2007 <sup>50</sup>       | No subgroup survival data of junctional cases |
| De Vita 2007 <sup>51</sup>       | No subgroup survival data of junctional cases |
| Cascinu 2007 <sup>52</sup>       | No subgroup survival data of junctional cases |
| Nitti 2006 <sup>53</sup>         | No subgroup survival data of junctional cases |
| Di Bartolomeo 2006 <sup>54</sup> | No subgroup survival data of junctional cases |
| Burmeister 2005 <sup>55</sup>    | No subgroup survival data of junctional cases |
| Bouche 2005 <sup>56</sup>        | No subgroup survival data of junctional cases |
| Lee 2004 <sup>57</sup>           | No subgroup survival data of junctional cases |
| Karacetin 2004 <sup>58</sup>     | No subgroup survival data of junctional cases |
| Hartgrink 2004 <sup>59</sup>     | No subgroup survival data of junctional cases |
| Walsh 2002 <sup>60</sup>         | No subgroup survival data of junctional cases |
| Chang 2002 <sup>61</sup>         | No subgroup survival data of junctional cases |
| Urba 2001 <sup>62</sup>          | No subgroup survival data of junctional cases |
| Neri 2001 <sup>63</sup>          | No subgroup survival data of junctional cases |
| Macdonald 2001 <sup>64</sup>     | No subgroup survival data of junctional cases |
| Takiguchi 2000 <sup>65</sup>     | No subgroup survival data of junctional cases |
| Skoropad 2000 <sup>66</sup>      | No subgroup survival data of junctional cases |
| Songun 1999 <sup>67</sup>        | No subgroup survival data of junctional cases |
| Nakajima 1999 <sup>68</sup>      | No subgroup survival data of junctional cases |
| Cirera 1999 <sup>69</sup>        | No subgroup survival data of junctional cases |
| Zhang 1998 <sup>70</sup>         | Containing unresectable advanced cases        |
| Kelsen 1998 <sup>71</sup>        | No subgroup survival data of junctional cases |
| Grau 1998 <sup>72</sup>          | No subgroup survival data of junctional cases |
| Walsh 1996 <sup>73</sup>         | No subgroup survival data of junctional cases |
| Tsavaris 1996 <sup>74</sup>      | No subgroup survival data of junctional cases |
| Neri 1996 <sup>75</sup>          | No subgroup survival data of junctional cases |
| Macdonald 1995 <sup>76</sup>     | No subgroup survival data of junctional cases |
| Lise 1995 <sup>77</sup>          | No subgroup survival data of junctional cases |
| Hallssey 1994 <sup>78</sup>      | No subgroup survival data of junctional cases |
| Arima 1994 <sup>79</sup>         | No subgroup survival data of junctional cases |
| Grau 1993 <sup>80</sup>          | No subgroup survival data of junctional cases |
| Fok 1993 <sup>81</sup>           | No subgroup survival data of junctional cases |
| Nygaard 1992 <sup>82</sup>       | No subgroup survival data of junctional cases |



|                             |                                               |
|-----------------------------|-----------------------------------------------|
| Krook 1991 <sup>83</sup>    | No subgroup survival data of junctional cases |
| Kelsen 1990 <sup>84</sup>   | No subgroup survival data of junctional cases |
| Coombes 1990 <sup>85</sup>  | No subgroup survival data of junctional cases |
| Bleiberg 1989 <sup>86</sup> | No subgroup survival data of junctional cases |
| Allum 1989 <sup>87</sup>    | No subgroup survival data of junctional cases |
| Roth 1988 <sup>88</sup>     | No subgroup survival data of junctional cases |
| Iizuka 1988 <sup>89</sup>   | No subgroup survival data of junctional cases |
| Nakajima 1984 <sup>90</sup> | No subgroup survival data of junctional cases |
| Moertel 1984 <sup>91</sup>  | No subgroup survival data of junctional cases |
| TGTSG 1982 <sup>92</sup>    | No subgroup survival data of junctional cases |

**eTable 2. Risk of bias assessment of included trials**

| <b>Study</b>    | <b>Random sequence generation</b> | <b>Allocation concealment</b>           | <b>Blinding of participants and personnel</b> | <b>Blinding of outcome assessment</b>                                            | <b>Incomplete outcome data</b>                                | <b>Selective reporting</b>                    | <b>Other sources of bias</b>                                                                    |
|-----------------|-----------------------------------|-----------------------------------------|-----------------------------------------------|----------------------------------------------------------------------------------|---------------------------------------------------------------|-----------------------------------------------|-------------------------------------------------------------------------------------------------|
| Cats 2018       | Low: Minimization method          | Low: Central allocation                 | High: Open-label design                       | Low: Overall survival was an objective endpoint that could not be easily biased. | Low: Intent-to-treat population for overall survival analysis | Low: All expected outcomes had been reported. | Low: Baseline features between both arms were well balanced.                                    |
| Fuchs 2017      | Unclear: No specific description  | Unclear: No specific description        | High: Open-label design                       | Low: Overall survival was an objective endpoint that could not be easily biased. | Low: Intent-to-treat population for overall survival analysis | Low: All expected outcomes had been reported. | Low: Baseline features between both arms were well balanced.                                    |
| Stahl 2017      | Low: Computerized randomization   | Low: Central allocation                 | High: This was an unblinded trial.            | Low: Overall survival was an objective endpoint that could not be easily biased. | Low: Intent-to-treat population for overall survival analysis | Unclear: No specific description              | High: The trial was prematurely closed and the median age between both arms was not comparable. |
| Cunningham 2017 | Low: Minimization method          | Low: Central allocation by telephone    | High: Open-label design                       | Low: Overall survival was an objective endpoint that could not be easily biased. | Low: Intent-to-treat population for overall survival analysis | Low: All expected outcomes had been reported. | Low: Baseline features between both arms were well balanced.                                    |
| Noh 2014        | Low: Permuted block randomization | Low: Centralized interactive allocation | High: Open-label design                       | Low: Overall survival was an objective endpoint that could not be easily biased. | Low: Intent-to-treat population for overall survival analysis | Low: All expected outcomes had been reported. | Low: Baseline features between both arms were well balanced.                                    |
| Ychou 2011      | Low: Minimization method          | Low: Central allocation by telephone    | High: Open-label design                       | Low: Overall survival was an objective endpoint that could not be easily biased. | Low: Intent-to-treat population for overall survival analysis | Low: All expected outcomes had been reported. | High: Insufficient recruitment of patients                                                      |

|                    |                                |                                            |                                                                                                      |                                                                                           |                                                                         |                                                        |                                                                    |
|--------------------|--------------------------------|--------------------------------------------|------------------------------------------------------------------------------------------------------|-------------------------------------------------------------------------------------------|-------------------------------------------------------------------------|--------------------------------------------------------|--------------------------------------------------------------------|
| Cunningham<br>2006 | Low:<br>Minimization<br>method | Low: Central<br>allocation by<br>telephone | High: Impossible<br>for masking due<br>to greatly<br>different<br>treatments<br>between both<br>arms | Low: Overall survival<br>was an objective<br>endpoint that could not<br>be easily biased. | Low: Intent-to-<br>treat population<br>for overall<br>survival analysis | Low: All<br>expected<br>outcomes had<br>been reported. | Low: Baseline features<br>between both arms were well<br>balanced. |
| MRCOCW<br>G 2002   | Low:<br>Minimization<br>method | Low: Central<br>allocation by<br>telephone | High: Because of<br>the nature of the<br>treatment,<br>randomization<br>was not masked.              | Low: Overall survival<br>was an objective<br>endpoint that could not<br>be easily biased. | Low: Intent-to-<br>treat population<br>for overall<br>survival analysis | Unclear: No<br>specific<br>description                 | Low: Baseline features<br>between both arms were well<br>balanced. |

**eTable 3. Clinical features of included trials re-organized by nodes**

| <b>Network nodes</b> | <b>Study</b>    | <b>Region</b>                             | <b>Treatment</b>                             | <b>Systemic regimens</b>                                     | <b>Sample size</b> | <b>Age</b> | <b>Gender (M/F)</b>              | <b>PS (0/1)</b> | <b>Siewert classification</b> |
|----------------------|-----------------|-------------------------------------------|----------------------------------------------|--------------------------------------------------------------|--------------------|------------|----------------------------------|-----------------|-------------------------------|
| PeriCRT              | Cats 2018       | Western (Netherlands, Sweden and Denmark) | Surgery plus perioperative chemoradiotherapy | Capecitabine plus cisplatin/oxaliplatin plus epirubicin      | 67                 | Adult      | Unspecified due to subgroup data | 0-1             | II-III                        |
| PeriCT               | Cats 2018       | Western (Netherlands, Sweden and Denmark) | Surgery plus perioperative chemotherapy      | Capecitabine plus cisplatin/oxaliplatin plus epirubicin      | 68                 | Adult      | Unspecified due to subgroup data | 0-1             | II-III                        |
|                      | Cunningham 2017 | Western (UK)                              | Surgery plus perioperative chemotherapy      | Capecitabine plus cisplatin plus epirubicin                  | 265                | Adult      | Unspecified due to subgroup data | 0-1             | I-III                         |
|                      | Ychou 2011      | Western (France)                          | Surgery plus perioperative chemotherapy      | 5-FU plus cisplatin                                          | 70                 | Adult      | Unspecified due to subgroup data | 0-1             | NA                            |
|                      | Cunningham 2006 | Western (UK)                              | Surgery plus perioperative chemotherapy      | 5-FU plus cisplatin plus epirubicin                          | 28                 | Adult      | Unspecified due to subgroup data | 0-1             | NA                            |
| PeriCTT              | Cunningham 2017 | Western (UK)                              | Surgery plus perioperative chemotherapy      | Capecitabine plus cisplatin plus epirubicin plus bevacizumab | 271                | Adult      | Unspecified due to subgroup data | 0-1             | I-III                         |
| PostCT               | Noh 2014        | Eastern (China and Korea)                 | Surgery plus adjuvant chemotherapy           | Capecitabine plus oxaliplatin                                | 24                 | Adult      | Unspecified due to subgroup data | 0-2             | NA                            |
| PreCRT               | Stahl 2017      | Western (Germany)                         | Surgery plus preoperative chemoradiotherapy  | 5-FU plus cisplatin                                          | 60                 | 60.6       | 54/6                             | 33/24           | I-II                          |

|       |                 |                           |                                        |                     |    |       |                                  |       |      |
|-------|-----------------|---------------------------|----------------------------------------|---------------------|----|-------|----------------------------------|-------|------|
| PreCT | Stahl 2017      | Western (Germany)         | Surgery plus preoperative chemotherapy | 5-FU plus cisplatin | 59 | 56.6  | 54/5                             | 38/17 | I-II |
|       | MRCOCWG 2002    | Western (UK)              | Surgery plus preoperative chemotherapy | 5-FU plus cisplatin | 40 | Adult | Unspecified due to subgroup data | 0-1   | NA   |
| S     | Noh 2014        | Eastern (China and Korea) | Surgery                                | None                | 24 | Adult | Unspecified due to subgroup data | 0-2   | NA   |
|       | Ychou 2011      | Western (France)          | Surgery                                | None                | 74 | Adult | Unspecified due to subgroup data | 0-1   | NA   |
|       | Cunningham 2006 | Western (UK)              | Surgery                                | None                | 30 | Adult | Unspecified due to subgroup data | 0-1   | NA   |
|       | MRCOCWG 2002    | Western (UK)              | Surgery                                | None                | 42 | Adult | Unspecified due to subgroup data | 0-1   | NA   |

eFigure 1 Network structure plot of overall survival

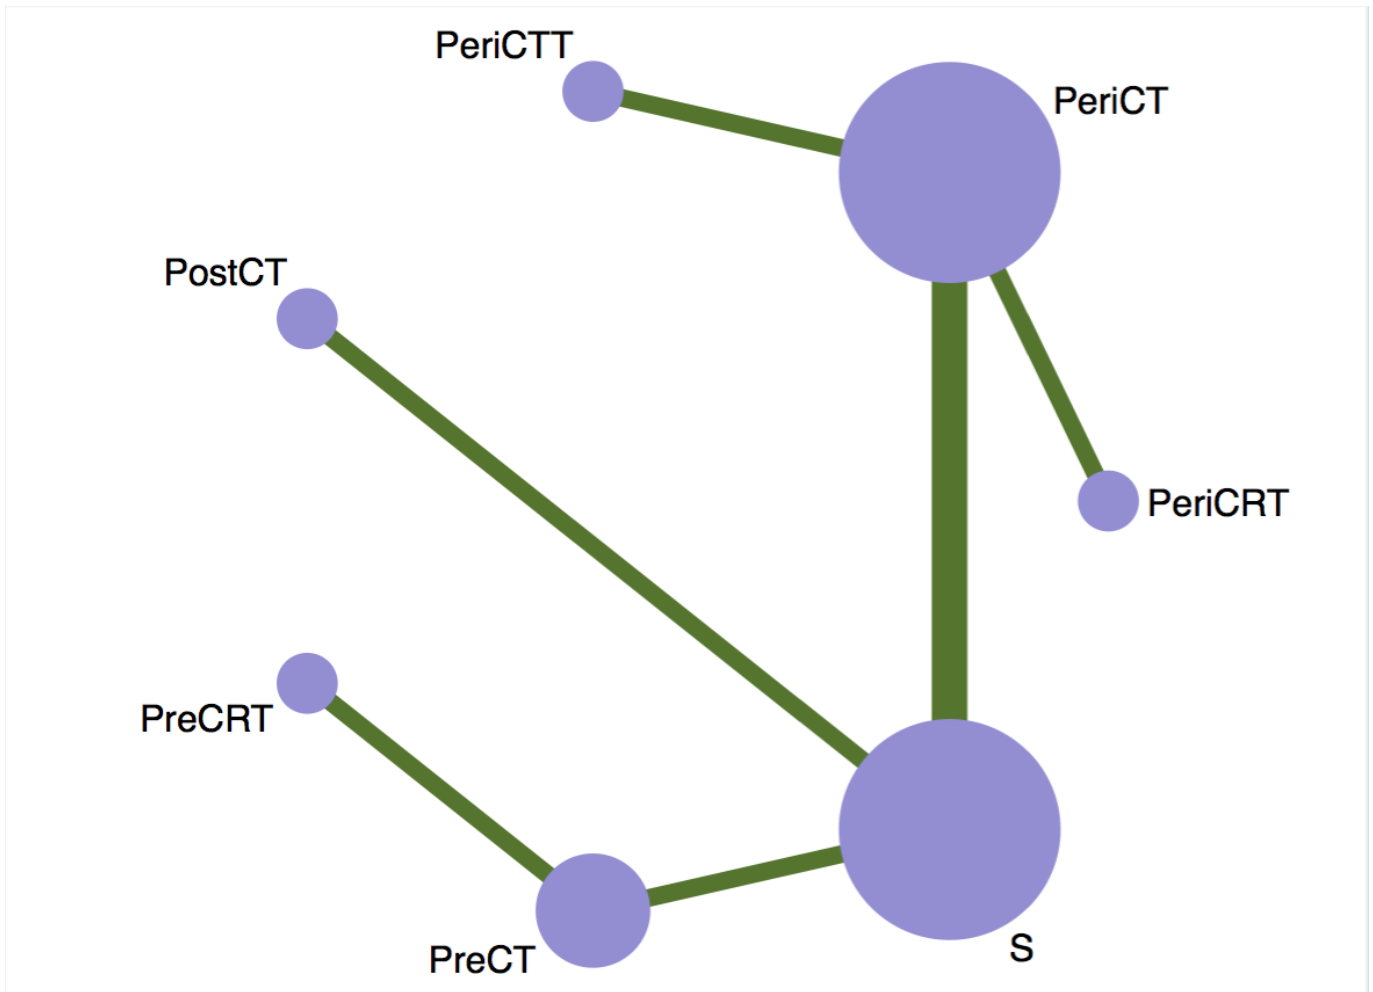

**Node:** **PeriCRT:** perioperative chemoradiotherapy; **PeriCT:** perioperative chemotherapy; **PreCART:** preoperative chemoradiotherapy; **PreCT:** preoperative chemotherapy; **PeriCTT:** perioperative chemotherapy plus targeted medication; **PostCT:** postoperative chemotherapy; **S:** surgery alone.

eFigure 2. Funnel plot of overall survival

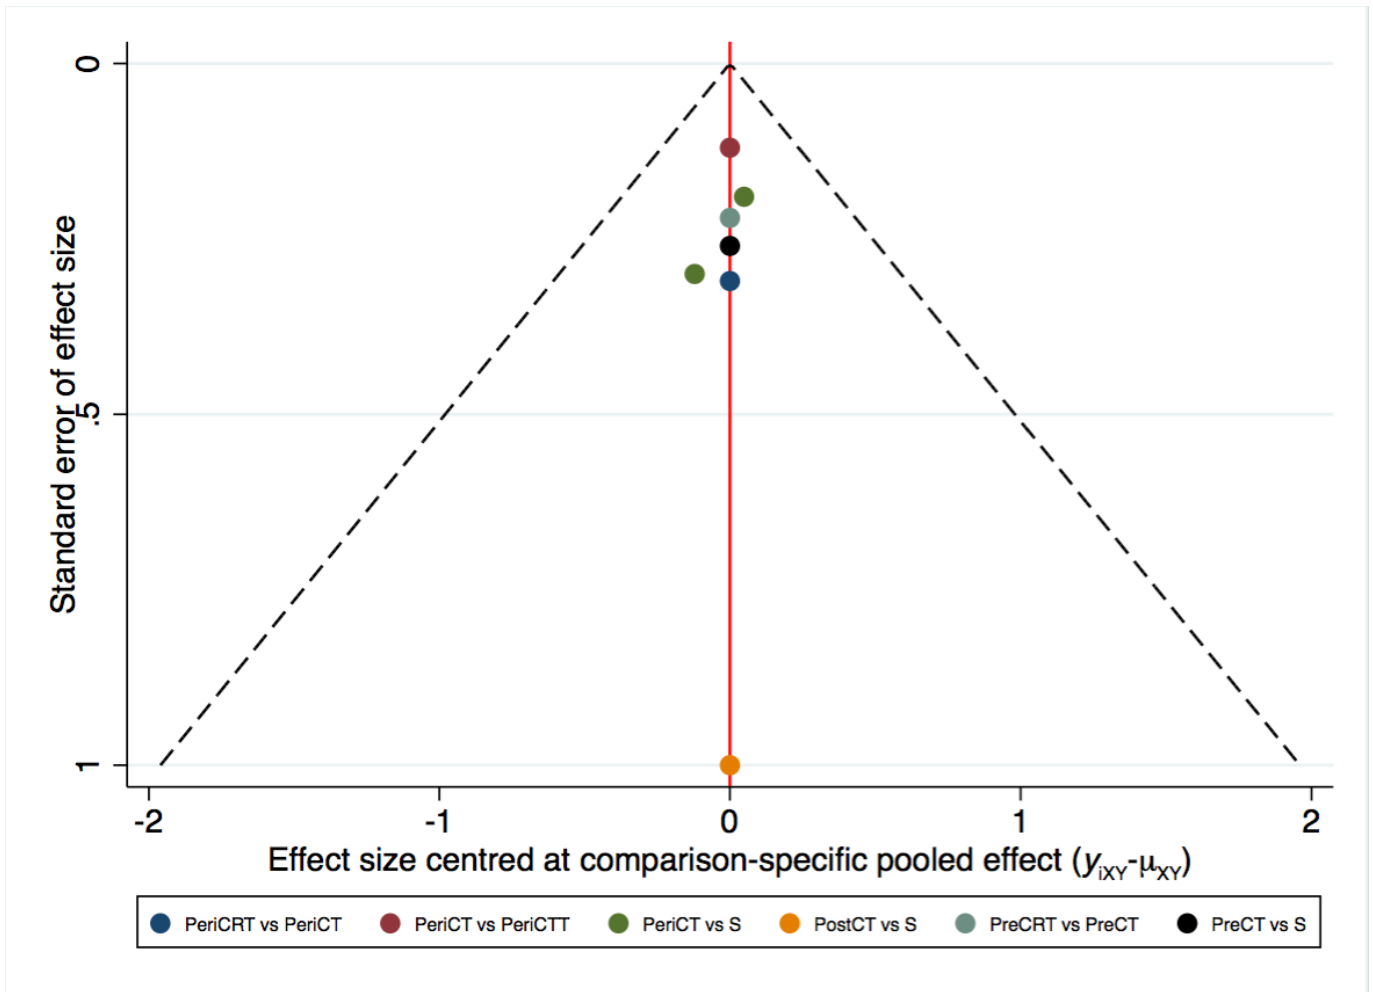

**eFigure 3. Sensitivity analysis of overall survival (Fixed-effects model)**

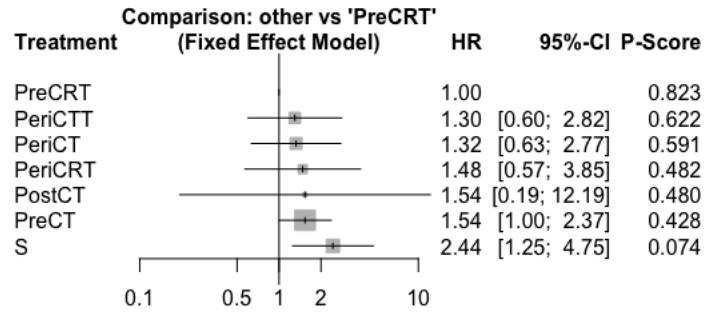



**eFigure 4. Sensitivity analysis of overall survival (Removal of potentially heterogeneous trials)**

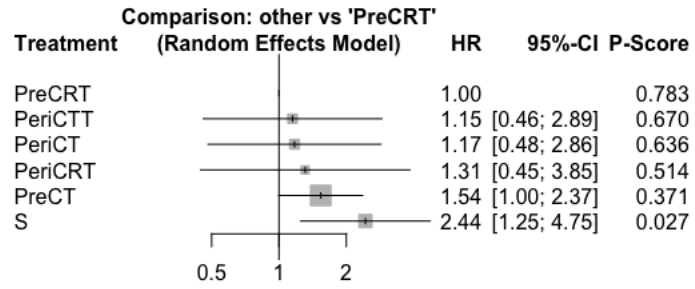

### **Supplementary figure legends**

eFigure 1 Network structure plot of overall survival

Node: PeriCRT: perioperative chemoradiotherapy; PeriCT: perioperative chemotherapy; PreCRT: preoperative chemoradiotherapy; PreCT: preoperative chemotherapy; PeriCTT: perioperative chemotherapy plus targeted medication; PostCT: postoperative chemotherapy; S: surgery alone.

eFigure 2. Funnel plot of overall survival

eFigure 3. Sensitivity analysis of overall survival (Fixed-effects model)

eFigure 4. Sensitivity analysis of overall survival (Removal of potentially heterogeneous trials)

### Supplementary reference

1. von Dobein GA, Klevebro F, Jacobsen AB, et al. Neoadjuvant chemotherapy versus neoadjuvant chemoradiotherapy for cancer of the esophagus or gastroesophageal junction: long-term results of a randomized clinical trial. *Dis Esophagus* 2018. DOI: 10.1093/dote/doy078.
2. Stahl M, Maderer A, Lordick F, et al. Perioperative chemotherapy with or without epidermal growth factor receptor blockade in unselected patients with locally advanced oesophagogastric adenocarcinoma: Randomized phase II study with advanced biomarker program of the German Cancer Society (AIO/CAO STO-0801). *Eur J Cancer* 2018; 93: 119-126. DOI: 10.1016/j.ejca.2018.01.079.
3. Ruhstaller T, Thuss-Patience P, Hayoz S, et al. Neoadjuvant chemotherapy followed by chemoradiation and surgery with and without cetuximab in patients with resectable esophageal cancer: a randomized, open-label, phase III trial (SAKK 75/08). *Ann Oncol* 2018; 29: 1386-1393. DOI: 10.1093/annonc/mdy105.
4. Lee CK, Jung M, Kim HS, et al. S-1 Based Doublet as an Adjuvant Chemotherapy for Curatively Resected Stage III Gastric Cancer: Results from the Randomized Phase III POST Trial. *Cancer Res Treat* 2018. DOI: 10.4143/crt.2018.028.
5. Zhao Q, Li Y, Huang J, et al. Short-term curative effect of S-1 plus oxaliplatin as perioperative chemotherapy for locally advanced gastric cancer: a prospective comparison study. *Pharmazie* 2017; 72: 236-240. DOI: 10.1691/ph.2017.6865.
6. Shiraishi O, Yamasaki M, Makino T, et al. Feasibility of Preoperative Chemotherapy with Docetaxel, Cisplatin, and 5-Fluorouracil versus Adriamycin, Cisplatin, and 5-Fluorouracil for Resectable Advanced Esophageal Cancer. *Oncology* 2017; 92: 101-108. DOI: 10.1159/000452765.
7. Mukherjee S, Hurt CN, Gwynne S, et al. NEOSCOPE: A randomised phase II study of induction chemotherapy followed by oxaliplatin/capecitabine or carboplatin/paclitaxel based pre-operative chemoradiation for resectable oesophageal adenocarcinoma. *Eur J Cancer* 2017; 74: 38-46. DOI: 10.1016/j.ejca.2016.11.031.
8. Alderson D, Cunningham D, Nankivell M, et al. Neoadjuvant cisplatin and fluorouracil versus epirubicin, cisplatin, and capecitabine followed by resection in patients with oesophageal adenocarcinoma (UK MRC OE05): an open-label, randomised phase 3 trial. *Lancet Oncol* 2017; 18: 1249-1260. DOI: 10.1016/S1470-2045(17)30447-3.
9. Al-Batran SE, Pauligk C, Homann N, et al. LBA-008Docetaxel, oxaliplatin, and fluorouracil/leucovorin (FLOT) versus epirubicin, cisplatin, and fluorouracil or capecitabine (ECF/ECX) as perioperative treatment of resectable gastric or gastro-esophageal junction adenocarcinoma: The multicenter, randomized phase 3 FLOT4 trial (German Gastric Group at AIO). *Ann Oncol* 2017; 28. DOI: 10.1093/annonc/mdx302.007.
10. Yoshikawa T, Morita S, Tanabe K, et al. Survival results of a randomised two-by-two factorial phase II trial comparing neoadjuvant chemotherapy with two and four courses of S-1 plus cisplatin (SC) and paclitaxel plus cisplatin (PC) followed by D2 gastrectomy for resectable advanced gastric cancer. *Eur J Cancer* 2016; 62: 103-111. DOI: 10.1016/j.ejca.2016.04.012.
11. Klevebro F, Alexandersson von Dobein G, Wang N, et al. A randomized clinical trial of neoadjuvant chemotherapy versus neoadjuvant chemoradiotherapy for cancer of the oesophagus or gastro-oesophageal junction. *Ann Oncol* 2016; 27: 660-667. DOI: 10.1093/annonc/mdw010.
12. Kleinberg LR, Catalano PJ, Forastiere AA, et al. Eastern Cooperative Oncology Group and American College of Radiology Imaging Network Randomized Phase 2 Trial of Neoadjuvant Preoperative Paclitaxel/Cisplatin/Radiation Therapy (RT) or Irinotecan/Cisplatin/RT in Esophageal Adenocarcinoma:

Long-Term Outcome and Implications for Trial Design. *Int J Radiat Oncol Biol Phys* 2016; 94: 738-746. DOI: 10.1016/j.ijrobp.2015.12.009.

13. Fazio N, Biffi R, Maibach R, et al. Preoperative versus postoperative docetaxel-cisplatin-fluorouracil (TCF) chemotherapy in locally advanced resectable gastric carcinoma: 10-year follow-up of the SAKK 43/99 phase III trial. *Ann Oncol* 2016; 27: 668-673. DOI: 10.1093/annonc/mdv620.

14. Al-Batran SE, Hofheinz RD, Pauligk C, et al. Histopathological regression after neoadjuvant docetaxel, oxaliplatin, fluorouracil, and leucovorin versus epirubicin, cisplatin, and fluorouracil or capecitabine in patients with resectable gastric or gastro-oesophageal junction adenocarcinoma (FLOT4-AIO): results from the phase 2 part of a multicentre, open-label, randomised phase 2/3 trial. *Lancet Oncol* 2016; 17: 1697-1708. DOI: 10.1016/S1470-2045(16)30531-9.

15. Zhao Q, Li Y, Wang J, et al. Concurrent Neoadjuvant Chemoradiotherapy for Siewert II and III Adenocarcinoma at Gastroesophageal Junction. *Am J Med Sci* 2015; 349: 472-476. DOI: 10.1097/MAJ.0000000000000476.

16. Yu JI, Lim DH, Ahn YC, et al. Effects of adjuvant radiotherapy on completely resected gastric cancer: A radiation oncologist's view of the ARTIST randomized phase III trial. *Radiother Oncol* 2015; 117: 171-177. DOI: 10.1016/j.radonc.2015.08.009.

17. Shapiro J, van Lanschot JJB, Hulshof M, et al. Neoadjuvant chemoradiotherapy plus surgery versus surgery alone for oesophageal or junctional cancer (CROSS): long-term results of a randomised controlled trial. *Lancet Oncol* 2015; 16: 1090-1098. DOI: 10.1016/S1470-2045(15)00040-6.

18. Park SH, Sohn TS, Lee J, et al. Phase III Trial to Compare Adjuvant Chemotherapy With Capecitabine and Cisplatin Versus Concurrent Chemoradiotherapy in Gastric Cancer: Final Report of the Adjuvant Chemoradiotherapy in Stomach Tumors Trial, Including Survival and Subset Analyses. *J Clin Oncol* 2015; 33: 3130-3136. DOI: 10.1200/JCO.2014.58.3930.

19. Klevebro F, Johnsen G, Johnson E, et al. Morbidity and mortality after surgery for cancer of the oesophagus and gastro-oesophageal junction: A randomized clinical trial of neoadjuvant chemotherapy vs. neoadjuvant chemoradiation. *Eur J Surg Oncol* 2015; 41: 920-926. DOI: 10.1016/j.ejso.2015.03.226.

20. Tsuburaya A, Yoshida K, Kobayashi M, et al. Sequential paclitaxel followed by tegafur and uracil (UFT) or S-1 versus UFT or S-1 monotherapy as adjuvant chemotherapy for T4a/b gastric cancer (SAMIT): a phase 3 factorial randomised controlled trial. *Lancet Oncol* 2014; 15: 886-893. DOI: 10.1016/S1470-2045(14)70025-7.

21. Shapiro J, van Hagen P, Lingsma HF, et al. Prolonged time to surgery after neoadjuvant chemoradiotherapy increases histopathological response without affecting survival in patients with esophageal or junctional cancer. *Ann Surg* 2014; 260: 807-813; discussion 813-804. DOI: 10.1097/SLA.0000000000000966.

22. Mariette C, Dahan L, Mornex F, et al. Surgery alone versus chemoradiotherapy followed by surgery for stage I and II esophageal cancer: final analysis of randomized controlled phase III trial FFCO 9901. *J Clin Oncol* 2014; 32: 2416-2422. DOI: 10.1200/JCO.2013.53.6532.

23. Kang YK, Yook JH, Chang HM, et al. Enhanced efficacy of postoperative adjuvant chemotherapy in advanced gastric cancer: results from a phase 3 randomized trial (AMC0101). *Cancer Chemother Pharmacol* 2014; 73: 139-149. DOI: 10.1007/s00280-013-2332-5.

24. Conroy T, Galais MP, Raoul JL, et al. Definitive chemoradiotherapy with FOLFOX versus fluorouracil and cisplatin in patients with oesophageal cancer (PRODIGE5/ACCORD17): final results of a randomised, phase 2/3 trial. *Lancet Oncol* 2014; 15: 305-314. DOI: 10.1016/S1470-2045(14)70028-2.

25. Bajetta E, Floriani I, Di Bartolomeo M, et al. Randomized trial on adjuvant treatment with FOLFIRI followed by docetaxel and cisplatin versus 5-fluorouracil and folinic acid for radically resected gastric cancer. *Ann Oncol* 2014; 25: 1373-1378. DOI: 10.1093/annonc/mdu146.
26. Lorenzen S, Pauligk C, Homann N, et al. Feasibility of perioperative chemotherapy with infusional 5-FU, leucovorin, and oxaliplatin with (FLOT) or without (FLO) docetaxel in elderly patients with locally advanced esophagogastric cancer. *Br J Cancer* 2013; 108: 519-526. DOI: 10.1038/bjc.2012.588.
27. Kang YK, Chang HM, Yook JH, et al. Adjuvant chemotherapy for gastric cancer: a randomised phase 3 trial of mitomycin-C plus either short-term doxifluridine or long-term doxifluridine plus cisplatin after curative D2 gastrectomy (AMC0201). *Br J Cancer* 2013; 108: 1245-1251. DOI: 10.1038/bjc.2013.86.
28. Crosby T, Hurt CN, Falk S, et al. Chemoradiotherapy with or without cetuximab in patients with oesophageal cancer (SCOPE1): a multicentre, phase 2/3 randomised trial. *Lancet Oncol* 2013; 14: 627-637. DOI: 10.1016/S1470-2045(13)70136-0.
29. Basi A, Sohrabkhani S, Zamani F, et al. Comparing Efficacy of Preoperative neo-Adjuvant Chemotherapy and Surgery versus Surgery Alone in Patients with Resectable Gastroesophageal Cancer. *Int J Hematol Oncol Stem Cell Res* 2013; 7: 24-28.
30. Ajani JA, Xiao L, Roth JA, et al. A phase II randomized trial of induction chemotherapy versus no induction chemotherapy followed by preoperative chemoradiation in patients with esophageal cancer. *Ann Oncol* 2013; 24: 2844-2849. DOI: 10.1093/annonc/mdt339.
31. Zhu WG, Xua DF, Pu J, et al. A randomized, controlled, multicenter study comparing intensity-modulated radiotherapy plus concurrent chemotherapy with chemotherapy alone in gastric cancer patients with D2 resection. *Radiother Oncol* 2012; 104: 361-366. DOI: 10.1016/j.radonc.2012.08.024.
32. van Hagen P, Hulshof MC, van Lanschot JJ, et al. Preoperative chemoradiotherapy for esophageal or junctional cancer. *N Engl J Med* 2012; 366: 2074-2084. DOI: 10.1056/NEJMoa1112088.
33. Smalley SR, Benedetti JK, Haller DG, et al. Updated analysis of SWOG-directed intergroup study 0116: a phase III trial of adjuvant radiochemotherapy versus observation after curative gastric cancer resection. *J Clin Oncol* 2012; 30: 2327-2333. DOI: 10.1200/JCO.2011.36.7136.
34. Lee J, Lim DH, Kim S, et al. Phase III trial comparing capecitabine plus cisplatin versus capecitabine plus cisplatin with concurrent capecitabine radiotherapy in completely resected gastric cancer with D2 lymph node dissection: the ARTIST trial. *J Clin Oncol* 2012; 30: 268-273. DOI: 10.1200/JCO.2011.39.1953.
35. Bang YJ, Kim YW, Yang HK, et al. Adjuvant capecitabine and oxaliplatin for gastric cancer after D2 gastrectomy (CLASSIC): a phase 3 open-label, randomised controlled trial. *Lancet* 2012; 379: 315-321. DOI: 10.1016/S0140-6736(11)61873-4.
36. Zhang XL, Shi HJ, Cui SZ, et al. Prospective, randomized trial comparing 5-FU/LV with or without oxaliplatin as adjuvant treatment following curative resection of gastric adenocarcinoma. *Eur J Surg Oncol* 2011; 37: 466-472. DOI: 10.1016/j.ejso.2011.01.027.
37. Sasako M, Sakuramoto S, Katai H, et al. Five-year outcomes of a randomized phase III trial comparing adjuvant chemotherapy with S-1 versus surgery alone in stage II or III gastric cancer. *J Clin Oncol* 2011; 29: 4387-4393. DOI: 10.1200/JCO.2011.36.5908.
38. Burmeister BH, Thomas JM, Burmeister EA, et al. Is concurrent radiation therapy required in patients receiving preoperative chemotherapy for adenocarcinoma of the oesophagus? A randomised phase II trial. *Eur J Cancer* 2011; 47: 354-360. DOI: 10.1016/j.ejca.2010.09.009.

39. Schuhmacher C, Gretschel S, Lordick F, et al. Neoadjuvant chemotherapy compared with surgery alone for locally advanced cancer of the stomach and cardia: European Organisation for Research and Treatment of Cancer randomized trial 40954. *J Clin Oncol* 2010; 28: 5210-5218. DOI: 10.1200/JCO.2009.26.6114.
40. Kwon HC, Kim MC, Kim KH, et al. Adjuvant chemoradiation versus chemotherapy in completely resected advanced gastric cancer with D2 nodal dissection. *Asia Pac J Clin Oncol* 2010; 6: 278-285. DOI: 10.1111/j.1743-7563.2010.01331.x.
41. Kulig J, Kolodziejczyk P, Sierzega M, et al. Adjuvant chemotherapy with etoposide, adriamycin and cisplatin compared with surgery alone in the treatment of gastric cancer: a phase III randomized, multicenter, clinical trial. *Oncology* 2010; 78: 54-61. DOI: 10.1159/000292360.
42. Bamias A, Karina M, Papakostas P, et al. A randomized phase III study of adjuvant platinum/docetaxel chemotherapy with or without radiation therapy in patients with gastric cancer. *Cancer Chemother Pharmacol* 2010; 65: 1009-1021. DOI: 10.1007/s00280-010-1256-6.
43. Stahl M, Walz MK, Stuschke M, et al. Phase III comparison of preoperative chemotherapy compared with chemoradiotherapy in patients with locally advanced adenocarcinoma of the esophagogastric junction. *J Clin Oncol* 2009; 27: 851-856. DOI: 10.1200/JCO.2008.17.0506.
44. Allum WH, Stenning SP, Bancewicz J, et al. Long-term results of a randomized trial of surgery with or without preoperative chemotherapy in esophageal cancer. *J Clin Oncol* 2009; 27: 5062-5067. DOI: 10.1200/JCO.2009.22.2083.
45. Tepper J, Krasna MJ, Niedzwiecki D, et al. Phase III trial of trimodality therapy with cisplatin, fluorouracil, radiotherapy, and surgery compared with surgery alone for esophageal cancer: CALGB 9781. *J Clin Oncol* 2008; 26: 1086-1092. DOI: 10.1200/JCO.2007.12.9593.
46. Shao ZY and Zhang JD. [Efficacy of oxaliplatin plus 5-fluorouracil/leucovorin calcium combined with concurrent radiotherapy for local advanced gastric cancer]. *Zhonghua Yi Xue Za Zhi* 2008; 88: 2547-2549.
47. Di Costanzo F, Gasperoni S, Manzione L, et al. Adjuvant chemotherapy in completely resected gastric cancer: a randomized phase III trial conducted by GOIRC. *J Natl Cancer Inst* 2008; 100: 388-398. DOI: 10.1093/jnci/djn054.
48. Sakuramoto S, Sasako M, Yamaguchi T, et al. Adjuvant chemotherapy for gastric cancer with S-1, an oral fluoropyrimidine. *N Engl J Med* 2007; 357: 1810-1820. DOI: 10.1056/NEJMoa072252.
49. Kelsen DP, Winter KA, Gunderson LL, et al. Long-term results of RTOG trial 8911 (USA Intergroup 113): a random assignment trial comparison of chemotherapy followed by surgery compared with surgery alone for esophageal cancer. *J Clin Oncol* 2007; 25: 3719-3725. DOI: 10.1200/JCO.2006.10.4760.
50. Findlay M, Storey D, GebSKI V, et al. A pilot study of preoperative and postoperative chemotherapy in patients with operable gastric cancer: Australasian Gastrointestinal Trials Group Study 9601. *ANZ J Surg* 2007; 77: 247-252. DOI: 10.1111/j.1445-2197.2007.04027.x.
51. De Vita F, Giuliani F, Orditura M, et al. Adjuvant chemotherapy with epirubicin, leucovorin, 5-fluorouracil and etoposide regimen in resected gastric cancer patients: a randomized phase III trial by the Gruppo Oncologico Italia Meridionale (GOIM 9602 Study). *Ann Oncol* 2007; 18: 1354-1358. DOI: 10.1093/annonc/mdm128.
52. Cascinu S, Labianca R, Barone C, et al. Adjuvant treatment of high-risk, radically resected gastric cancer patients with 5-fluorouracil, leucovorin, cisplatin, and epidoxorubicin in a randomized controlled trial. *J Natl Cancer Inst* 2007; 99: 601-607. DOI: 10.1093/jnci/djk131.

53. Nitti D, Wils J, Dos Santos JG, et al. Randomized phase III trials of adjuvant FAMTX or FEMTX compared with surgery alone in resected gastric cancer. A combined analysis of the EORTC GI Group and the ICCG. *Ann Oncol* 2006; 17: 262-269. DOI: 10.1093/annonc/mdj077.
54. Di Bartolomeo M, Buzzoni R, Mariani L, et al. Feasibility of sequential therapy with FOLFIRI followed by docetaxel/cisplatin in patients with radically resected gastric adenocarcinoma. A randomized phase III trial. *Oncology* 2006; 71: 341-346. DOI: 10.1159/000108575.
55. Burmeister BH, Smithers BM, GebSKI V, et al. Surgery alone versus chemoradiotherapy followed by surgery for resectable cancer of the oesophagus: a randomised controlled phase III trial. *Lancet Oncol* 2005; 6: 659-668. DOI: 10.1016/S1470-2045(05)70288-6.
56. Bouche O, Ychou M, Burtin P, et al. Adjuvant chemotherapy with 5-fluorouracil and cisplatin compared with surgery alone for gastric cancer: 7-year results of the FFCD randomized phase III trial (8801). *Ann Oncol* 2005; 16: 1488-1497. DOI: 10.1093/annonc/mdi270.
57. Lee JJ, Kim SY, Shin IS, et al. Randomized phase III trial of cisplatin, epirubicin, leucovorin, 5-fluorouracil (PELF) combination versus 5-fluorouracil alone as adjuvant chemotherapy in curative resected stage III gastric cancer. *Cancer Res Treat* 2004; 36: 140-145. DOI: 10.4143/crt.2004.36.2.140.
58. Karacetin D and Incekara O. A randomized trial of 5-fluorouracil, leucovorin, cisplatin and epirubicin (PELF) versus 5-fluorouracil, leucovorin and etoposide (ELF) given as adjuvant chemotherapy to patients with resected advanced gastric adenocarcinomas. *J BUON* 2004; 9: 263-267.
59. Hartgrink HH, van de Velde CJ, Putter H, et al. Neo-adjuvant chemotherapy for operable gastric cancer: long term results of the Dutch randomised FAMTX trial. *Eur J Surg Oncol* 2004; 30: 643-649. DOI: 10.1016/j.ejso.2004.04.013.
60. Walsh TN, Grennell M, Mansoor S, et al. Neoadjuvant treatment of advanced stage esophageal adenocarcinoma increases survival. *Dis Esophagus* 2002; 15: 121-124.
61. Chang HM, Jung KH, Kim TY, et al. A phase III randomized trial of 5-fluorouracil, doxorubicin, and mitomycin C versus 5-fluorouracil and mitomycin C versus 5-fluorouracil alone in curatively resected gastric cancer. *Ann Oncol* 2002; 13: 1779-1785.
62. Urba SG, Orringer MB, Turrisi A, et al. Randomized trial of preoperative chemoradiation versus surgery alone in patients with locoregional esophageal carcinoma. *J Clin Oncol* 2001; 19: 305-313. DOI: 10.1200/JCO.2001.19.2.305.
63. Neri B, Cini G, Andreoli F, et al. Randomized trial of adjuvant chemotherapy versus control after curative resection for gastric cancer: 5-year follow-up. *Br J Cancer* 2001; 84: 878-880. DOI: 10.1054/bjoc.2000.1472.
64. Macdonald JS, Smalley SR, Benedetti J, et al. Chemoradiotherapy after surgery compared with surgery alone for adenocarcinoma of the stomach or gastroesophageal junction. *N Engl J Med* 2001; 345: 725-730. DOI: 10.1056/NEJMoa010187.
65. Takiguchi N, Nakajima N, Saitoh N, et al. A phase III randomized study comparing oral doxifluridine and oral 5-fluorouracil after curative resection of gastric cancer. *Int J Oncol* 2000; 16: 1021-1027.
66. Skoropad VY, Berdov BA, Mardynski YS, et al. A prospective, randomized trial of pre-operative and intraoperative radiotherapy versus surgery alone in resectable gastric cancer. *Eur J Surg Oncol* 2000; 26: 773-779. DOI: 10.1053/ejso.2000.1002.
67. Songun I, Keizer HJ, Hermans J, et al. Chemotherapy for operable gastric cancer: results of the Dutch randomised FAMTX trial. The Dutch Gastric Cancer Group (DGCG). *Eur J Cancer* 1999; 35: 558-562.

68. Nakajima T, Nashimoto A, Kitamura M, et al. Adjuvant mitomycin and fluorouracil followed by oral uracil plus tegafur in serosa-negative gastric cancer: a randomised trial. Gastric Cancer Surgical Study Group. *Lancet* 1999; 354: 273-277.
69. Cirera L, Balil A, Batiste-Alentorn E, et al. Randomized clinical trial of adjuvant mitomycin plus tegafur in patients with resected stage III gastric cancer. *J Clin Oncol* 1999; 17: 3810-3815. DOI: 10.1200/JCO.1999.17.12.3810.
70. Zhang ZX, Gu XZ, Yin WB, et al. Randomized clinical trial on the combination of preoperative irradiation and surgery in the treatment of adenocarcinoma of gastric cardia (AGC)--report on 370 patients. *Int J Radiat Oncol Biol Phys* 1998; 42: 929-934.
71. Kelsen DP, Ginsberg R, Pajak TF, et al. Chemotherapy followed by surgery compared with surgery alone for localized esophageal cancer. *N Engl J Med* 1998; 339: 1979-1984. DOI: 10.1056/NEJM199812313392704.
72. Grau JJ, Estape J, Fuster J, et al. Randomized trial of adjuvant chemotherapy with mitomycin plus fluorouracil versus mitomycin alone in resected locally advanced gastric cancer. *J Clin Oncol* 1998; 16: 1036-1039. DOI: 10.1200/JCO.1998.16.3.1036.
73. Walsh TN, Noonan N, Hollywood D, et al. A comparison of multimodal therapy and surgery for esophageal adenocarcinoma. *N Engl J Med* 1996; 335: 462-467. DOI: 10.1056/NEJM199608153350702.
74. Tsavaris N, Tentas K, Kosmidis P, et al. A randomized trial comparing adjuvant fluorouracil, epirubicin, and mitomycin with no treatment in operable gastric cancer. *Chemotherapy* 1996; 42: 220-226. DOI: 10.1159/000239446.
75. Neri B, de Leonardis V, Romano S, et al. Adjuvant chemotherapy after gastric resection in node-positive cancer patients: a multicentre randomised study. *Br J Cancer* 1996; 73: 549-552.
76. Macdonald JS, Fleming TR, Peterson RF, et al. Adjuvant chemotherapy with 5-FU, adriamycin, and mitomycin-C (FAM) versus surgery alone for patients with locally advanced gastric adenocarcinoma: A Southwest Oncology Group study. *Ann Surg Oncol* 1995; 2: 488-494.
77. Lise M, Nitti D, Marchet A, et al. Final results of a phase III clinical trial of adjuvant chemotherapy with the modified fluorouracil, doxorubicin, and mitomycin regimen in resectable gastric cancer. *J Clin Oncol* 1995; 13: 2757-2763. DOI: 10.1200/JCO.1995.13.11.2757.
78. Hallissey MT, Dunn JA, Ward LC, et al. The second British Stomach Cancer Group trial of adjuvant radiotherapy or chemotherapy in resectable gastric cancer: five-year follow-up. *Lancet* 1994; 343: 1309-1312.
79. Arima S, Ohsato K, Hisatsugu T, et al. Multicentre randomised study of adjuvant chemotherapy with mitomycin C and tegafur or tegafur-uracil in gastric cancer. *Eur J Surg* 1994; 160: 227-232.
80. Grau JJ, Estape J, Alcobendas F, et al. Positive results of adjuvant mitomycin-C in resected gastric cancer: a randomised trial on 134 patients. *Eur J Cancer* 1993; 29A: 340-342.
81. Fok M, Sham JS, Choy D, et al. Postoperative radiotherapy for carcinoma of the esophagus: a prospective, randomized controlled study. *Surgery* 1993; 113: 138-147.
82. Nygaard K, Hagen S, Hansen HS, et al. Pre-operative radiotherapy prolongs survival in operable esophageal carcinoma: a randomized, multicenter study of pre-operative radiotherapy and chemotherapy. The second Scandinavian trial in esophageal cancer. *World J Surg* 1992; 16: 1104-1109; discussion 1110.
83. Krook JE, O'Connell MJ, Wieand HS, et al. A prospective, randomized evaluation of intensive-course 5-fluorouracil plus doxorubicin as surgical adjuvant chemotherapy for resected gastric cancer. *Cancer* 1991; 67: 2454-2458.



84. Kelsen DP, Minsky B, Smith M, et al. Preoperative therapy for esophageal cancer: a randomized comparison of chemotherapy versus radiation therapy. *J Clin Oncol* 1990; 8: 1352-1361. DOI: 10.1200/JCO.1990.8.8.1352.
85. Coombes RC, Schein PS, Chilvers CE, et al. A randomized trial comparing adjuvant fluorouracil, doxorubicin, and mitomycin with no treatment in operable gastric cancer. International Collaborative Cancer Group. *J Clin Oncol* 1990; 8: 1362-1369. DOI: 10.1200/JCO.1990.8.8.1362.
86. Bleiberg H, Goffin JC, Dalesio O, et al. Adjuvant radiotherapy and chemotherapy in resectable gastric cancer. A randomized trial of the gastro-intestinal tract cancer cooperative group of the EORTC. *Eur J Surg Oncol* 1989; 15: 535-543.
87. Allum WH, Hallissey MT and Kelly KA. Adjuvant chemotherapy in operable gastric cancer. 5 year follow-up of first British Stomach Cancer Group trial. *Lancet* 1989; 1: 571-574.
88. Roth JA, Pass HI, Flanagan MM, et al. Randomized clinical trial of preoperative and postoperative adjuvant chemotherapy with cisplatin, vindesine, and bleomycin for carcinoma of the esophagus. *J Thorac Cardiovasc Surg* 1988; 96: 242-248.
89. Iizuka T, Ide H, Kakegawa T, et al. Preoperative radioactive therapy for esophageal carcinoma. Randomized evaluation trial in eight institutions. *Chest* 1988; 93: 1054-1058.
90. Nakajima T, Takahashi T, Takagi K, et al. Comparison of 5-fluorouracil with ftorafur in adjuvant chemotherapies with combined inductive and maintenance therapies for gastric cancer. *J Clin Oncol* 1984; 2: 1366-1371. DOI: 10.1200/JCO.1984.2.12.1366.
91. Moertel CG, Childs DS, O'Fallon JR, et al. Combined 5-fluorouracil and radiation therapy as a surgical adjuvant for poor prognosis gastric carcinoma. *J Clin Oncol* 1984; 2: 1249-1254. DOI: 10.1200/JCO.1984.2.11.1249.
92. Controlled trial of adjuvant chemotherapy following curative resection for gastric cancer. The Gastrointestinal Tumor Study Group. *Cancer* 1982; 49: 1116-1122.
